# Supplementary material for: Sm doped mesoporous CeO2 nanocrystals: aqueous solution-based surfactant assisted low temperature synthesis, characterization and their improved autocatalytic activity
Source: Royal Society of Chemistry journal article supplement (doi:10.1039/c5dt03688g), 2015-12-10
Supplement: c5dt03688g1.pdf [file c5dt03688g1.pdf]

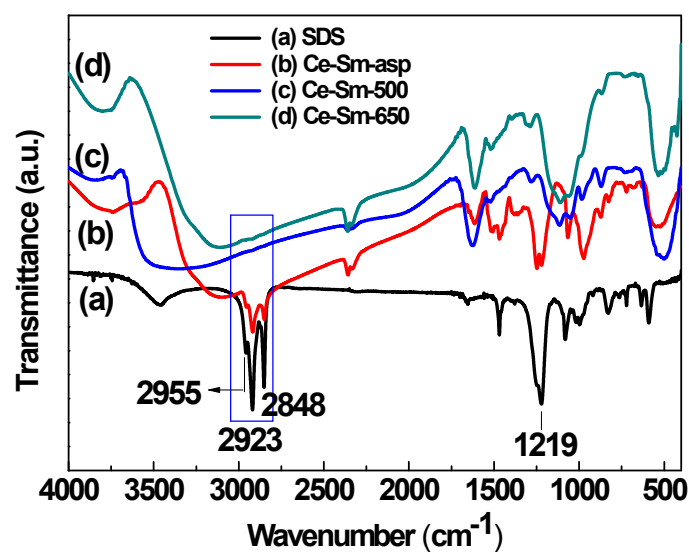

**Fig. S1** FT-IR spectra of (a) SDS powder, and Sm<sup>3+</sup> doped CeO<sub>2</sub> powders (b) as-prepared precursor, and calcined at (c) 500°C, and (d) 650°C for 2 h.

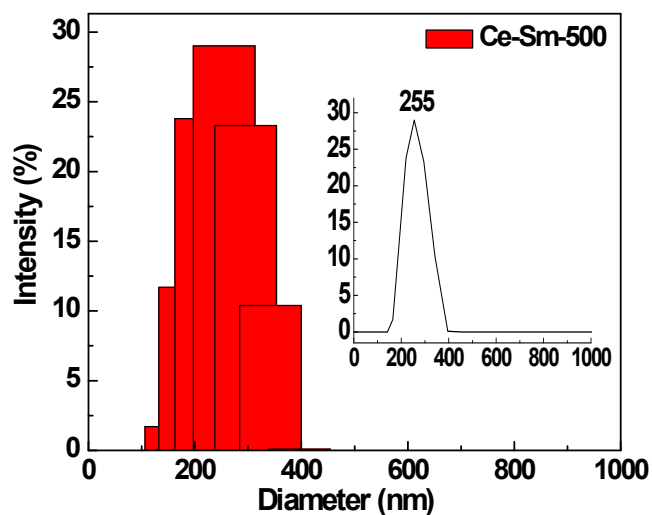

**Fig. S2** Hydrodynamic diameter of Sm<sup>3+</sup> doped CeO<sub>2</sub> powder calcined at 500°C for 2 h.
